# Supplementary material
Source: MDPI journal article supplement (https://www.mdpi.com/2073-4433/14/3/459)
Supplement: s1 [file s1]

# ENSO and PDO Effect on Stratospheric Dynamics in Isca Numerical Experiments

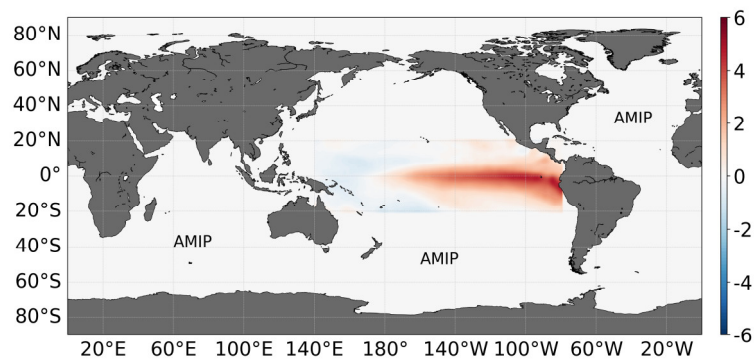

**Figure S1.** El Niño anomalies 1997/1998.

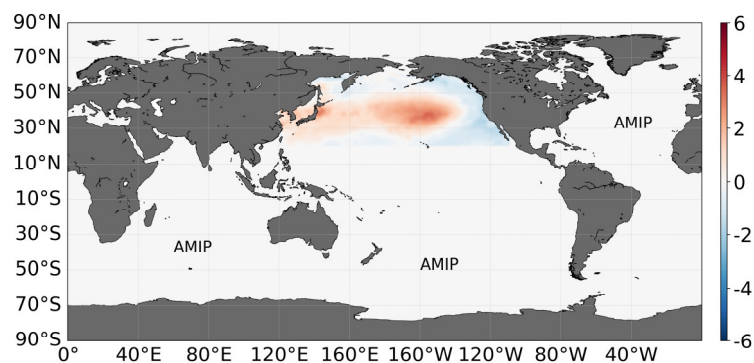

**Figure S2.** Negative phase of the PDO (1941).

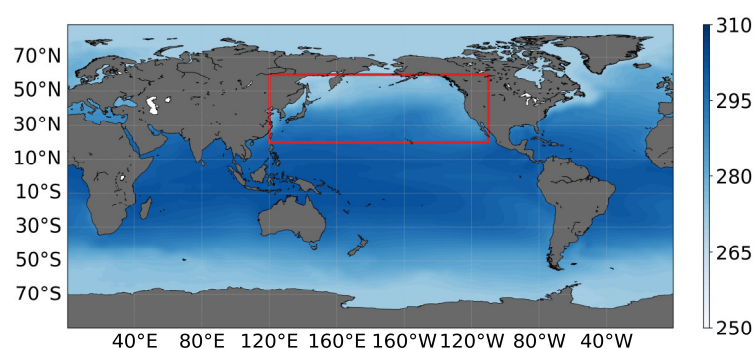

**Figure S3.** SST boundary condition for PDO- experiment.

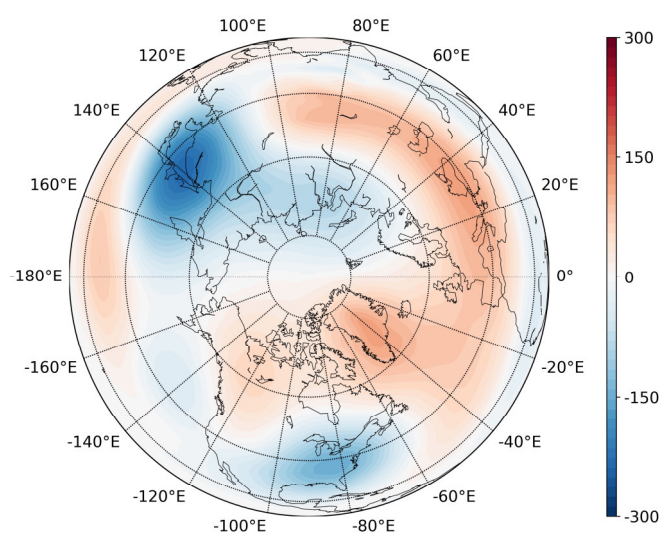

**Figure S4.** Mean hgt anomalies at 500 hPa in EN experiment.
